# Supplementary material
Source: PubMed Central journal article supplement (PMC7528677)
Supplement: nuz021_supplementary_data.pdf [file nuz021_supplementary_data.pdf]

## Appendix S1. Search terms used in the literature search

### **Pubmed:**

All fields: ((food\* OR diet\* OR beverage\* OR drink\*) AND (market\* OR advert\* OR promotion\*) AND (regulat\* OR restrict\* OR law\* OR polic\*) AND (child\* OR adolescent\*) AND ("United Kingdom" OR Britain OR British OR "South Korea" OR "South Korean" OR Ireland OR Irish OR Mexico OR Mexican OR Poland OR Polish OR Uruguay OR Uruguayan OR Taiwan OR Taiwanese OR Chile OR Chilean OR Quebec OR Canada OR Canadian OR Norway OR Norwegian OR Hungary OR Hungarian OR Sweden OR Swedish OR Spain OR Spanish OR "Costa Rica" OR "Costa Rican" OR Turkey OR Turkish OR Ecuador OR Ecuadorian))

Filtered for:

- Time period: April 1, 2013 to December 12, 2018
- Language: English

Search results: 641 (552)

---

### **Web of Science:**

ALL=((food\* OR diet\* OR beverage\* OR drink\*) AND (market\* OR advert\* OR promotion\*) AND (regulat\* OR restrict\* OR law\* OR polic\*) AND (child\* OR adolescent\*) AND ("United Kingdom" OR Britain OR British OR "South Korea" OR "South Korean" OR Ireland OR Irish OR Mexico OR Mexican OR Poland OR Polish OR Uruguay OR Uruguayan OR Taiwan OR Taiwanese OR Chile OR Chilean OR Quebec OR Canada OR Canadian OR Norway OR Norwegian OR Hungary OR Hungarian OR Sweden OR Swedish OR Spain OR Spanish OR "Costa Rica" OR "Costa Rican" OR Turkey OR Turkish OR Ecuador OR Ecuadorian))

Filtered for:

- Time period: 2013-2018
- Language: English

Search results: 584

---

**Total records combined:** 1,225

Duplicates: 238

Remaining: 987

Excluded: 983

|                                                 |
|-------------------------------------------------|
| <b>Full texts meeting inclusion criteria: 4</b> |
|-------------------------------------------------|
